# Supplementary material for: Symmetry reduction induced by argon tagging gives access to low-lying excited states of FeH+ in the overtone region of the Fe–H stretching mode
Source: Royal Society of Chemistry journal article supplement (doi:10.1039/d4cp03270e), 2024-01-01
Supplement: d4cp03270e1.pdf [file d4cp03270e1.pdf]

## Supporting Information

for

**Symmetry reduction induced by argon tagging gives access to low-lying excited states of FeH<sup>+</sup>  
in the overtone region of the Fe-H stretching mode**

*Shan Jin,<sup>a</sup> Marcos Juanes,<sup>a,b</sup> Christian van der Linde,<sup>a</sup> Milan Ončák,<sup>a\*</sup> and Martin K. Beyer<sup>a\*</sup>*

<sup>a</sup>Institut für Ionenphysik und Angewandte Physik, Universität Innsbruck, Technikerstraße 25,  
6020 Innsbruck, Austria

<sup>b</sup>Departamento Química Física y Química Inorgánica, University of Valladolid, Paseo de Belén 7,  
47011 Valladolid, Spain

Corresponding Authors

\*E-mail: [milan.oncak@uibk.ac.at](mailto:milan.oncak@uibk.ac.at); [martin.beyer@uibk.ac.at](mailto:martin.beyer@uibk.ac.at)

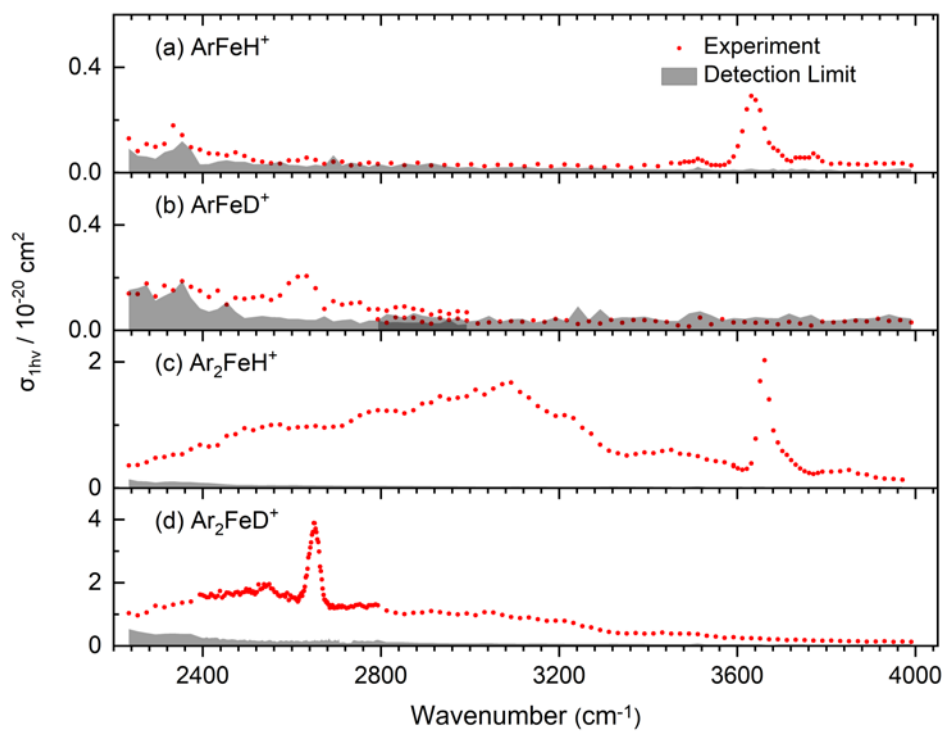

**Figure S1.** One-photon cross sections of experimental IRMPD spectra of a) ArFeH<sup>+</sup>, b) ArFeD<sup>+</sup>, c) Ar<sub>2</sub>FeH<sup>+</sup>, and d) Ar<sub>2</sub>FeD<sup>+</sup>, at T ≈ 80 K.

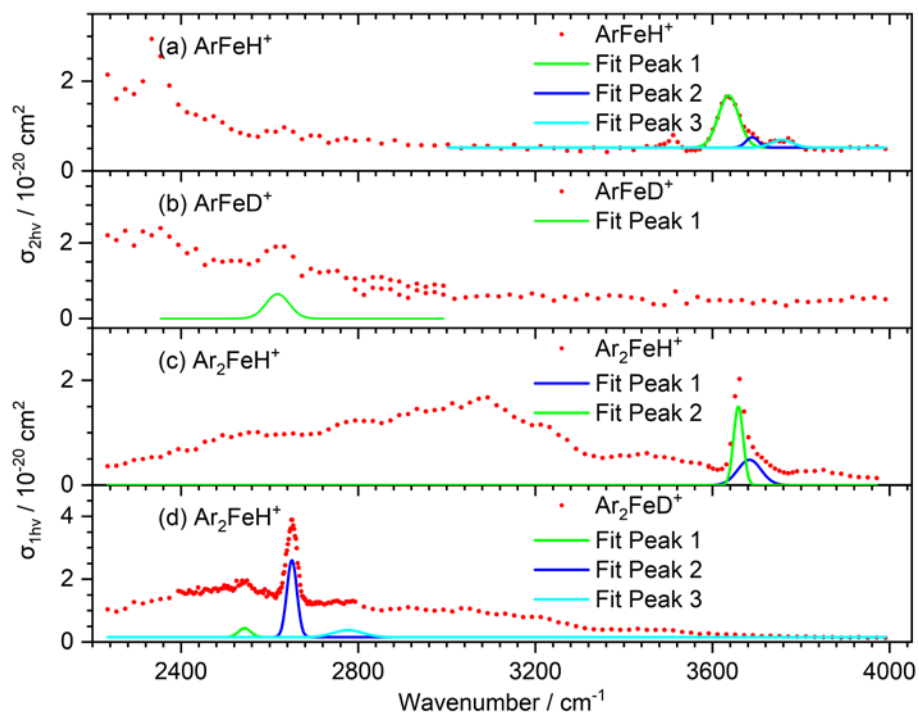

**Figure S2.** Potential vibrational contributions to the cumulative Gauss fit in Figure 1.

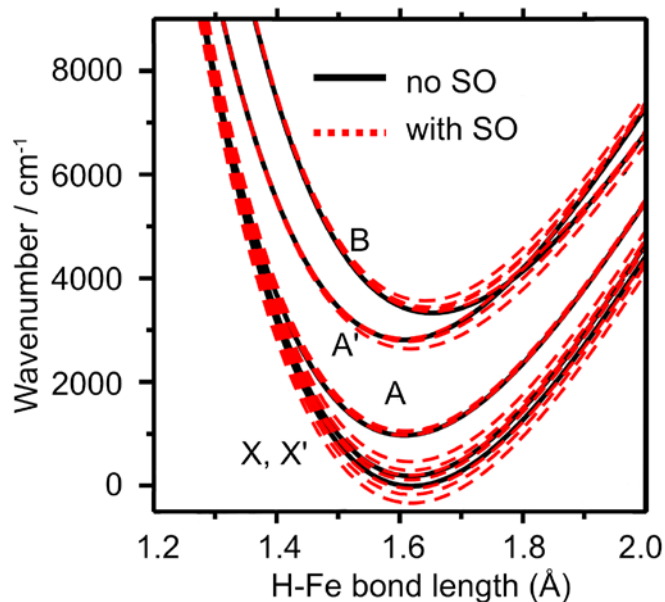

**Figure S3.** The simulated potential energy curves of  $\text{Ar}_2\text{FeH}^+$  with, and without spin-orbital coupling performed at the MRCI(8,7)+SO/aug-cc-pVQZ(Fe,H), ECP10MWB(Ar) level of theory. Other molecular parameters are fixed to the equilibrium geometry as obtained at the B3LYP+D3/aug-cc-pVTZ level: Fe–Ar bond length 2.578 Å, Ar–Fe–Ar angle 94.0°.

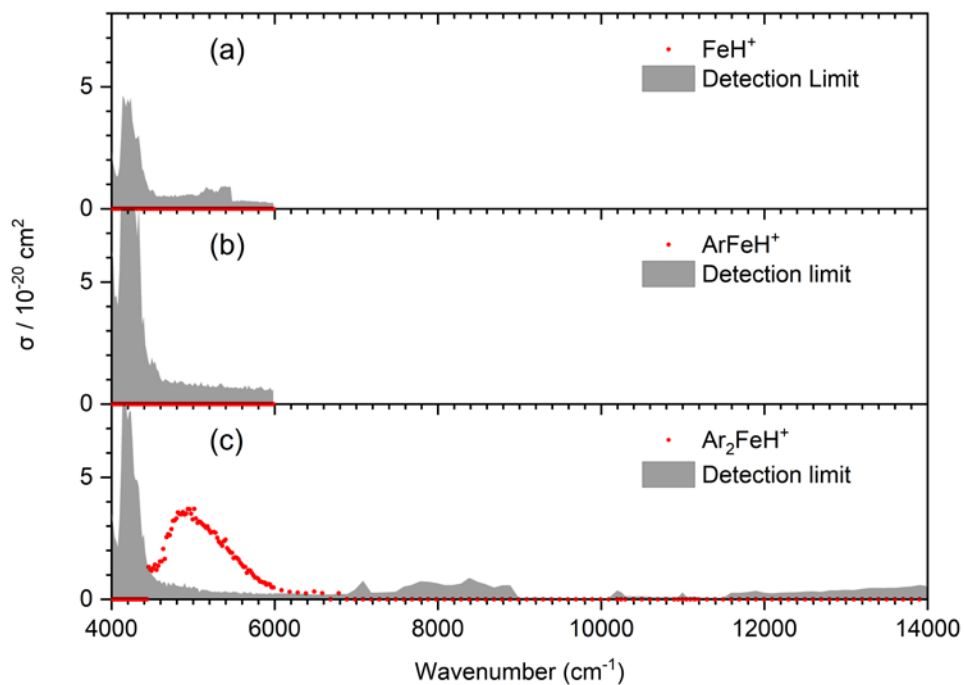

**Figure S4.** The infrared spectrum of  $\text{FeH}^+$  and  $\text{ArFeH}^+$  within the range of  $4000 - 6000 \text{ cm}^{-1}$ , and  $\text{Ar}_2\text{FeH}^+$  within the range of  $4000 - 14000 \text{ cm}^{-1}$ . The scans for  $\text{ArFeH}^+$  and  $\text{FeH}^+$  were conducted in the region of  $4000 - 6000 \text{ cm}^{-1}$ , revealing no observable fragmentation. A prominent broad band for  $\text{Ar}_2\text{FeH}^+$  is evident at approximately  $5050 \text{ cm}^{-1}$ , characterized by a FWHM of  $890 \text{ cm}^{-1}$ . It is noteworthy that the noise level within the  $4000-4400 \text{ cm}^{-1}$  range is affected by low laser energy.

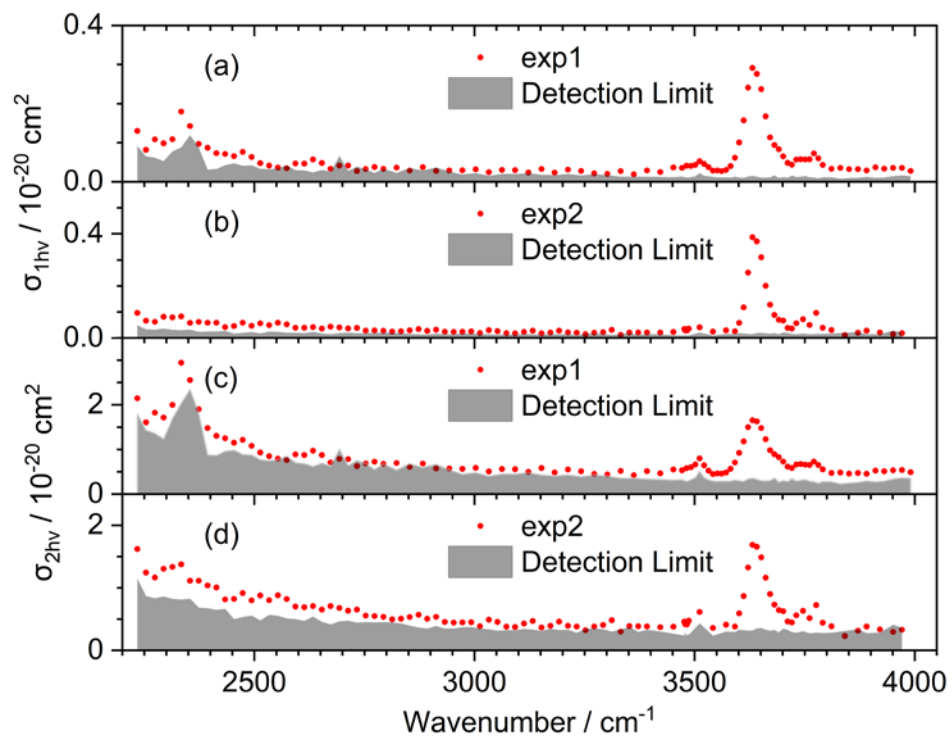

**Figure S5.** Additional experimental spectrum of  $\text{ArFeH}^+$  (exp2) compared with the spectrum shown in Figure 1 (exp1). (a) and (b) cross sections assuming a one-photon process; (c) and (d) cross sections assuming a two-photon process.

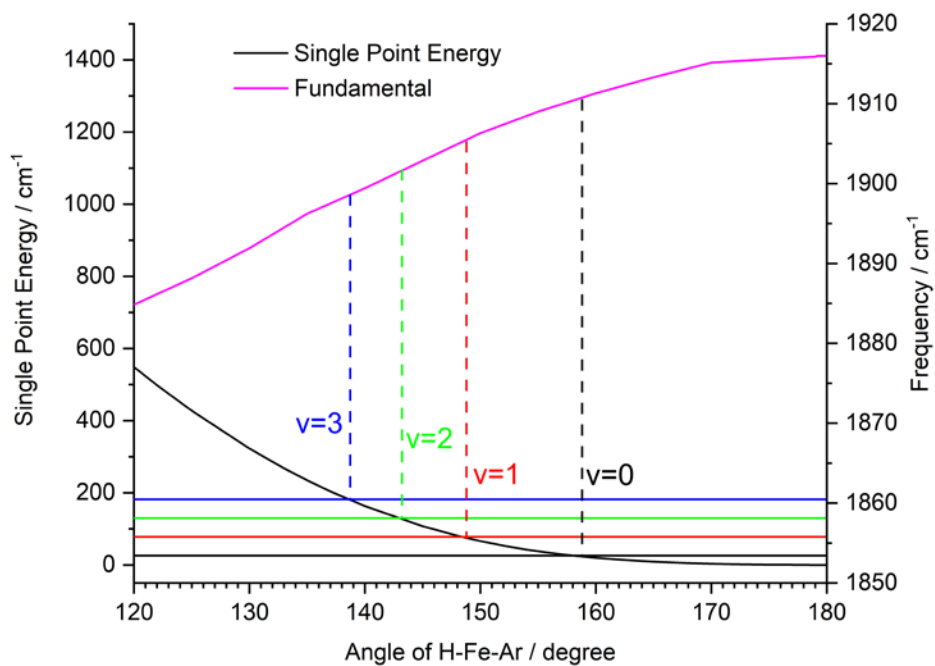

**Figure S6.** Single point energy for a relaxed scan of the H-Fe-Ar angle at the B3LYP-D3/aug-cc-pVTZ level and Fe-H stretch frequency calculated along the scan coordinate, with the option Freq=Projected in Gaussian. Classical minimum angles for thermally populated vibrational states at  $T = 80$  K are labeled with dashed lines for better visualization. The harmonic frequency of the H-Fe-Ar bend of  $52\text{ cm}^{-1}$ , as calculated at the same level of theory, was used for vibrational energy levels, which are marked by horizontal lines.

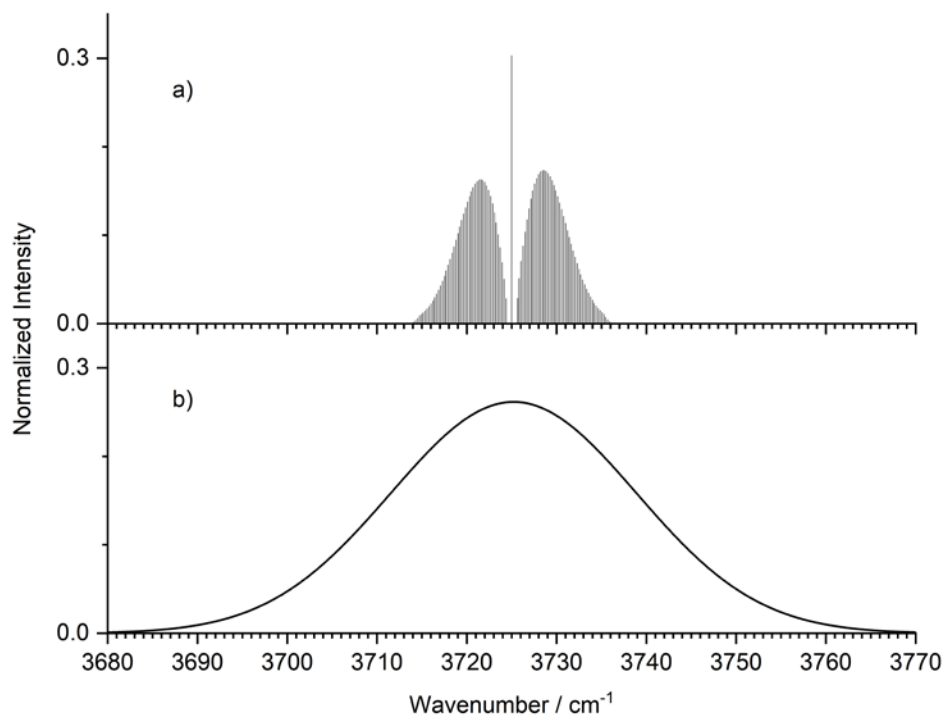

**Figure S7.** Ro-vibrational spectrum of  $\text{ArFeH}^+$  simulated with pGopher at 80 K, assuming weak spin-orbital coupling. The molecular parameters were calculated at the B3LYP+D3/aug-cc-pVTZ level of theory within anharmonic vibrational analysis. a) No broadening; b) Gaussian broadening with FWHM of  $30 \text{ cm}^{-1}$ , resulting in a near-Gaussian peak with FWHM of  $32 \text{ cm}^{-1}$ .

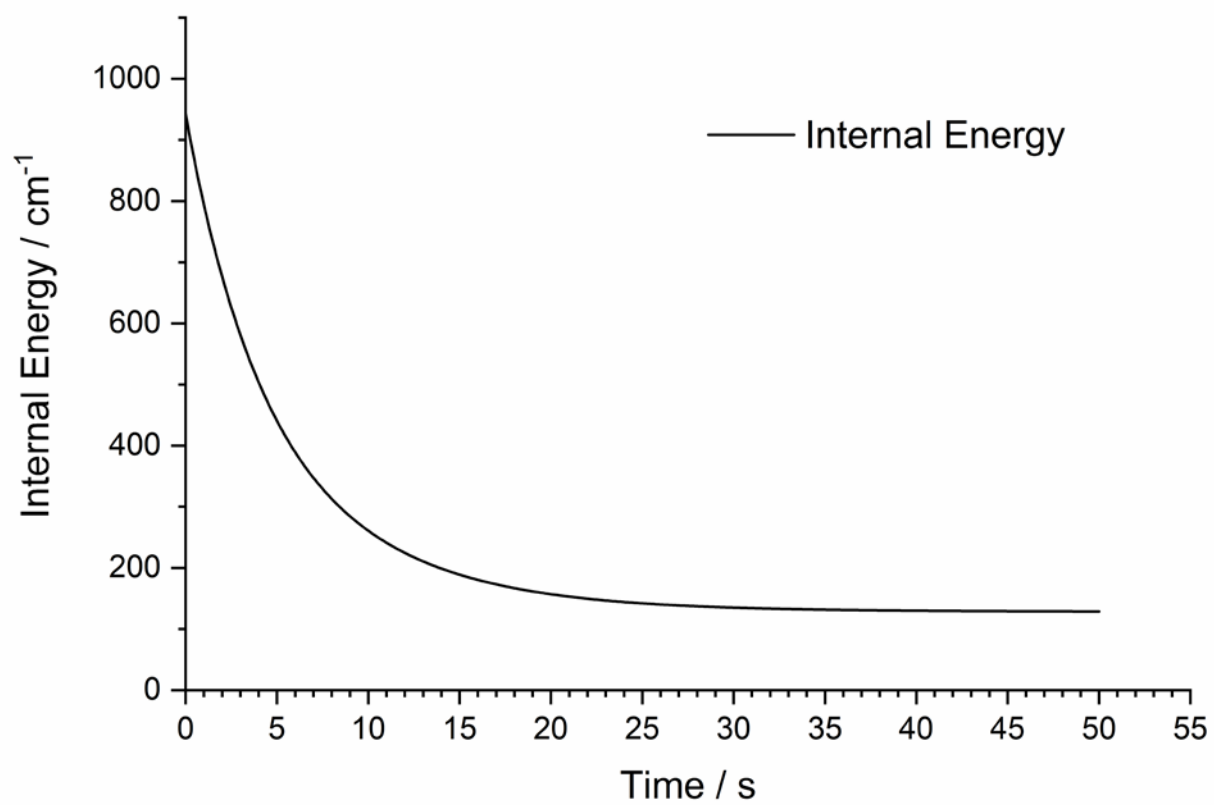

**Figure S8.** Radiative cooling curve of ArFeH<sup>+</sup> with initial temperature 300 K in a black-body environment at  $T = 80$  K.



**Table S1.** Experimental band position  $\nu$  and full-width at half maximum (FWHM) (in  $\text{cm}^{-1}$ ) for  $\text{ArFeH}^+$ ,  $\text{ArFeD}^+$ ,  $\text{Ar}_2\text{FeH}^+$ , and  $\text{Ar}_2\text{FeD}^+$  extracted from Figure 1. Calculated anharmonic vibrational frequencies ( $\text{cm}^{-1}$ ) in the Fe–H overtone region are given for comparison, calculated using anharmonic frequency analysis at the B3LYP-D3/aug-cc-pVTZ level.

| Ion                                  | $\nu$ | FWHM | vibrational mode                                                         | symmetry       | theory            |
|--------------------------------------|-------|------|--------------------------------------------------------------------------|----------------|-------------------|
| <b>ArFeH<sup>+</sup></b>             | 3636  | 55   | Fe-H stretch overtone                                                    | $\Sigma^+$     | 3725              |
|                                      | 3690  | 33   | Combination band of Fe-H stretch overtone and Ar-Fe-H bend               | $\Pi$          | 3776 <sup>a</sup> |
|                                      | 3757  | 55   | Combination band of Fe-H stretch overtone and Fe-Ar stretch              | $\Sigma^+$     | 3900 <sup>b</sup> |
| <b>ArFeD<sup>+</sup></b>             | 2618  | 62   | Fe-D stretch overtone                                                    | $\Sigma^+$     | 2682              |
| <b>Ar<sub>2</sub>FeH<sup>+</sup></b> | 3659  | 25   | Fe-H stretch overtone                                                    | A <sub>1</sub> | 3689              |
|                                      | 3684  | 62   | Combination band of Fe-H stretch overtone and Ar-Fe-Ar bend              | A <sub>1</sub> | 3742 <sup>c</sup> |
| <b>Ar<sub>2</sub>FeD<sup>+</sup></b> | 2543  | 33   | Hot band of excited Ar-Fe-Ar bend to Fe-D stretch overtone               | A <sub>1</sub> | 2612 <sup>b</sup> |
|                                      |       |      | Hot band of excited Fe-Ar antisymmetric stretch to Fe-D stretch overtone | B <sub>2</sub> | 2513 <sup>b</sup> |
|                                      |       |      | Hot band of excited Fe-Ar symmetric stretch to Fe-D stretch overtone     | A <sub>1</sub> | 2506 <sup>b</sup> |
|                                      | 2650  | 27   | Fe-D stretch overtone                                                    | A <sub>1</sub> | 2659              |
|                                      | 2777  | 77   | Combination band of Fe-D stretch overtone and Fe-Ar symmetric stretch    | A <sub>1</sub> | 2810 <sup>b</sup> |

<sup>a</sup> Fe–H overtone and harmonic fundamentals summed up as the anharmonic calculation provides unrealistic values for the Ar-Fe-H bend.

<sup>b</sup> Overtone and anharmonic fundamentals summed up / subtracted.

<sup>c</sup> Extracted from 3-quanta anharmonic calculation.

**Table S2.** Electronic transitions of  $\text{Ar}_2\text{FeH}^+$  and  $\text{Ar}_2\text{FeD}^+$  as extracted from Figure 1 and 3 (in  $\text{cm}^{-1}$ ).

| Ion                       | $\nu$ | FWHM |
|---------------------------|-------|------|
| $\text{Ar}_2\text{FeH}^+$ | 2635  | 652  |
|                           | 3088  | 410  |
|                           | 3489  | 191  |
|                           | 3780  | 388  |
|                           | 4860  | 341  |
|                           | 5096  | 1051 |
| $\text{Ar}_2\text{FeD}^+$ | 2483  | 497  |
|                           | 3038  | 455  |
|                           | 3504  | 238  |

**Table S3.**  $\text{FeH}^+$  harmonic and anharmonic vibrational frequencies as calculated using various methods and the aug-cc-pVTZ basis set (in  $\text{cm}^{-1}$ ). The frequencies are unscaled.

| Mode                   | B3LYP | B3LYP-D3 | CAM-B3LYP | $\omega\text{B97XD}$ | MP2  | CCSD |
|------------------------|-------|----------|-----------|----------------------|------|------|
| Harmonic Fundamental   | 1879  | 1855     | 1928      | 1924                 | 1952 | 1871 |
| Anharmonic Fundamental | 1847  | 1793     | 1899      | 1896                 | 1935 |      |
| Anharmonic Overtone    | 3662  | 3525     | 3768      | 3763                 | 3852 |      |

**Table S4.**  $\text{FeD}^+$  harmonic and anharmonic vibrational frequencies as calculated using various methods and the aug-cc-pVTZ basis set (in  $\text{cm}^{-1}$ ). The frequencies are unscaled.

| Mode                   | B3LYP | B3LYP-D3 | CAM-B3LYP | $\omega\text{B97XD}$ | MP2  | CCSD |
|------------------------|-------|----------|-----------|----------------------|------|------|
| Harmonic Fundamental   | 1341  | 1324     | 1376      | 1373                 | 1393 | 1335 |
| Anharmonic Fundamental | 1325  | 1293     | 1361      | 1358                 | 1384 |      |
| Anharmonic Overtone    | 2633  | 2554     | 2707      | 2702                 | 2760 |      |

**Table S5.** ArFeH<sup>+</sup> harmonic vibrational frequencies<sup>a</sup> and anharmonic vibrational frequencies<sup>b</sup> as calculated using various methods and the aug-cc-pVTZ basis set (in cm<sup>-1</sup>). The frequencies are unscaled. For CAM-B3LYP and  $\omega$ B97XD functionals, unphysical results were obtained in the anharmonic calculation, which are not shown.

| symmetry   | mode                       | B3LYP | B3LYP-D3          | CAM-B3LYP | $\omega$ B97XD | MP2  | CCSD |
|------------|----------------------------|-------|-------------------|-----------|----------------|------|------|
| $\Pi$      | H-Fe-Ar bend <sup>a</sup>  | 56    | 52                | 65        | 39             | 147  | 133  |
| $\Sigma^+$ | Fe-Ar stretch <sup>a</sup> | 172   | 174               | 185       | 176            | 187  | 181  |
| $\Sigma^+$ | Fe-H stretch <sup>a</sup>  | 1918  | 1916              | 1959      | 1945           | 1930 | 1894 |
|            | Fe-H stretch <sup>b</sup>  | 1888  | 1881 <sup>c</sup> | –         | –              | 1891 | –    |
| $\Sigma^+$ | Fe-H overtone <sup>b</sup> | 3744  | 3725              | –         | –              | 3741 | –    |

<sup>c</sup> Fixed symmetry causes deviation from Table 2 in Jin et al., *J. Phys. Chem. Lett.* **13**, 5867–5872 (2022). DOI: 10.1021/acs.jpcclett.2c01511.

**Table S6.** ArFeD<sup>+</sup> harmonic vibrational frequencies<sup>a</sup> and anharmonic vibrational frequencies<sup>b</sup> as calculated using various methods and the aug-cc-pVTZ basis set (in cm<sup>-1</sup>). The frequencies are unscaled.

| symmetry   | mode                       | B3LYP | B3LYP-D3 | CAM-B3LYP | $\omega$ B97XD | MP2  | CCSD |
|------------|----------------------------|-------|----------|-----------|----------------|------|------|
| $\Pi$      | D-Fe-Ar bend <sup>a</sup>  | 41    | 37       | 47        | 27             | 107  | 94   |
| $\Sigma^+$ | Fe-Ar stretch <sup>a</sup> | 171   | 173      | 184       | 175            | 186  | 181  |
| $\Sigma^+$ | Fe-D stretch <sup>a</sup>  | 1369  | 1367     | 1398      | 1388           | 1377 | 1353 |
|            | Fe-D stretch <sup>b</sup>  | 1373  | 1350     | 1384      | 1429           | 1358 | –    |
| $\Sigma^+$ | Fe-D overtone <sup>b</sup> | 2730  | 2682     | 2753      | 2851           | 2696 | –    |

**Table S7.** Ar<sub>2</sub>FeH<sup>+</sup> harmonic vibrational frequencies as calculated using various methods and the aug-cc-pVTZ basis set. The frequencies are unscaled.<sup>a</sup>

| symmetry       | mode                       | B3LYP | B3LYP-D3 | CAM-B3LYP | $\omega$ B97XD | MP2  |
|----------------|----------------------------|-------|----------|-----------|----------------|------|
| A <sub>1</sub> | Fe-Ar bend                 | 43    | 46       | 45        | 47             | 54   |
| B <sub>2</sub> | Fe-Ar asymmetric stretch   | 148   | 151      | 160       | 146            | 147  |
| A <sub>1</sub> | Fe-Ar symmetric stretch    | 152   | 157      | 165       | 151            | 166  |
| B <sub>1</sub> | Fe-H bend out of the plane | 207   | 206      | 214       | 207            | 209  |
| B <sub>2</sub> | Fe-H bend in the plane     | 237   | 234      | 245       | 236            | 211  |
| A <sub>1</sub> | Fe-H stretch               | 1906  | 1906     | 1947      | 1931           | 1924 |

<sup>a</sup> All values reproduced from Table S3 in Jin et al., *J. Phys. Chem. Lett.* **13**, 5867–5872 (2022). DOI: 10.1021/acs.jpcclett.2c01511.

**Table S8.** Ar<sub>2</sub>FeH<sup>+</sup> anharmonic vibrational frequencies as calculated using various methods and the aug-cc-pVTZ basis set. The frequencies are unscaled.

| symmetry       | mode                       | B3LYP             | B3LYP-D3          | CAM-B3LYP         | $\omega$ B97XD    | MP2               |
|----------------|----------------------------|-------------------|-------------------|-------------------|-------------------|-------------------|
| A <sub>1</sub> | Fe-Ar bend                 | 43                | 50                | 56                | 42                | 29                |
| B <sub>2</sub> | Fe-Ar asymmetry stretch    | 139               | 144               | 158               | 212               | 198               |
| A <sub>1</sub> | Fe-Ar symmetry stretch     | 147               | 153               | 163               | 206               | 151               |
| B <sub>1</sub> | Fe-H bend out of the plane | 202               | 208               | 275               | 284               | 229               |
| B <sub>2</sub> | Fe-H bend in the plane     | 231               | 235               | 298               | 245               | 253               |
| A <sub>1</sub> | Fe-H stretch               | 1868 <sup>a</sup> | 1864 <sup>a</sup> | 1918 <sup>a</sup> | 1988 <sup>a</sup> | 1882 <sup>a</sup> |
| A <sub>1</sub> | Fe-H overtone              | 3703              | 3689              | 3806              | 4008              | 3721              |

<sup>a</sup> Fixed symmetry causes deviations from Table S4 in Jin et al., *J. Phys. Chem. Lett.* **13**, 5867–5872 (2022). DOI: 10.1021/acs.jpcllett.2c01511.

**Table S9.** Ar<sub>2</sub>FeD<sup>+</sup> harmonic vibrational frequencies (in cm<sup>-1</sup>) as calculated using various methods and the aug-cc-pVTZ basis set. The frequencies are unscaled.

| symmetry       | mode                       | B3LYP | B3LYP-D3 | CAM-B3LYP | $\omega$ B97XD | MP2  |
|----------------|----------------------------|-------|----------|-----------|----------------|------|
| A <sub>1</sub> | Fe-Ar bend                 | 43    | 46       | 45        | 47             | 54   |
| B <sub>2</sub> | Fe-Ar asymmetry stretch    | 148   | 151      | 160       | 146            | 139  |
| A <sub>1</sub> | Fe-Ar symmetry stretch     | 152   | 157      | 165       | 150            | 165  |
| B <sub>1</sub> | Fe-D bend out of the plane | 152   | 151      | 157       | 151            | 153  |
| B <sub>2</sub> | Fe-D bend in the plane     | 169   | 168      | 175       | 169            | 160  |
| A <sub>1</sub> | Fe-D stretch               | 1360  | 1360     | 1390      | 1377           | 1373 |

**Table S10.** Ar<sub>2</sub>FeD<sup>+</sup> anharmonic vibrational frequencies (in cm<sup>-1</sup>) as calculated using various methods and the aug-cc-pVTZ basis set. The frequencies are unscaled.

| symmetry       | mode                       | B3LYP | B3LYP-D3 | CAM-B3LYP | $\omega$ B97XD | MP2  |
|----------------|----------------------------|-------|----------|-----------|----------------|------|
| A <sub>1</sub> | Fe-Ar bend                 | 43    | 46       | 53        | 41             | 36   |
| B <sub>2</sub> | Fe-Ar asymmetry stretch    | 141   | 145      | 157       | 219            | 158  |
| A <sub>1</sub> | Fe-Ar symmetry stretch     | 146   | 152      | 162       | 207            | 154  |
| B <sub>1</sub> | Fe-D bend out of the plane | 141   | 152      | 195       | 189            | 179  |
| B <sub>2</sub> | Fe-D bend in the plane     | 159   | 169      | 212       | 165            | 257  |
| A <sub>1</sub> | Fe-D stretch               | 1341  | 1339     | 1376      | 1408           | 1353 |
| A <sub>1</sub> | Fe-D overtone              | 2665  | 2659     | 2736      | 2832           | 2684 |

## Experimental spectral data

**Table S11.** ArFeH<sup>+</sup> 1&2-photon process cross-section data

| Wavenumber       | ArFeH+                 | Detection limit | ArFeH+                 | Detection limit |
|------------------|------------------------|-----------------|------------------------|-----------------|
| cm <sup>-1</sup> | 1-photon cross-section |                 | 2-photon cross-section |                 |
| 2234.087         | 1.30E-21               | 9.15E-22        | 2.15E-20               | 1.79E-20        |
| 2254.049         | 8.18E-22               | 6.49E-22        | 1.61E-20               | 1.43E-20        |
| 2274.010         | 1.08E-21               | 6.14E-22        | 1.82E-20               | 1.36E-20        |
| 2293.972         | 9.81E-22               | 5.28E-22        | 1.71E-20               | 1.24E-20        |
| 2313.934         | 1.09E-21               | 7.80E-22        | 2.00E-20               | 1.69E-20        |
| 2333.895         | 1.79E-21               | 8.78E-22        | 2.94E-20               | 2.04E-20        |
| 2353.857         | 1.43E-21               | 1.20E-21        | 2.55E-20               | 2.34E-20        |
| 2373.818         | 9.65E-22               | 8.76E-22        | 1.90E-20               | 1.81E-20        |
| 2393.780         | 8.71E-22               | 3.15E-22        | 1.48E-20               | 8.82E-21        |
| 2413.742         | 7.31E-22               | 3.30E-22        | 1.31E-20               | 8.67E-21        |
| 2433.703         | 7.12E-22               | 4.25E-22        | 1.25E-20               | 9.59E-21        |
| 2453.665         | 6.54E-22               | 4.73E-22        | 1.15E-20               | 9.83E-21        |
| 2473.626         | 7.65E-22               | 4.12E-22        | 1.21E-20               | 8.88E-21        |
| 2493.588         | 6.32E-22               | 4.21E-22        | 1.08E-20               | 8.78E-21        |
| 2513.550         | 4.74E-22               | 3.32E-22        | 9.32E-21               | 7.72E-21        |
| 2533.511         | 4.13E-22               | 3.25E-22        | 8.48E-21               | 7.51E-21        |
| 2553.473         | 3.62E-22               | 3.42E-22        | 7.93E-21               | 7.69E-21        |
| 2573.434         | 3.45E-22               | 4.24E-22        | 7.66E-21               | 8.52E-21        |
| 2593.396         | 4.66E-22               | 2.97E-22        | 8.88E-21               | 7.01E-21        |
| 2613.358         | 4.63E-22               | 2.88E-22        | 8.73E-21               | 6.84E-21        |
| 2633.319         | 5.69E-22               | 2.36E-22        | 9.70E-21               | 6.17E-21        |
| 2653.281         | 4.79E-22               | 3.02E-22        | 8.73E-21               | 6.91E-21        |
| 2673.242         | 3.29E-22               | 2.59E-22        | 7.07E-21               | 6.30E-21        |
| 2693.204         | 4.14E-22               | 6.63E-22        | 7.90E-21               | 1.01E-20        |
| 2713.166         | 4.16E-22               | 2.80E-22        | 7.81E-21               | 6.38E-21        |
| 2733.127         | 2.74E-22               | 3.89E-22        | 6.27E-21               | 7.55E-21        |
| 2753.089         | 3.25E-22               | 3.23E-22        | 6.85E-21               | 6.78E-21        |
| 2773.050         | 3.77E-22               | 2.23E-22        | 7.23E-21               | 5.55E-21        |
| 2793.012         | 3.28E-22               | 3.32E-22        | 6.74E-21               | 6.74E-21        |
| 2822.954         | 3.60E-22               | 2.24E-22        | 6.95E-21               | 5.42E-21        |
| 2852.897         | 2.89E-22               | 3.55E-22        | 6.08E-21               | 6.79E-21        |
| 2882.839         | 3.74E-22               | 2.88E-22        | 6.81E-21               | 5.95E-21        |
| 2912.782         | 2.75E-22               | 3.71E-22        | 5.75E-21               | 6.69E-21        |
| 2942.724         | 2.87E-22               | 2.59E-22        | 5.71E-21               | 5.45E-21        |
| 2972.666         | 2.92E-22               | 1.87E-22        | 5.63E-21               | 4.48E-21        |

| Wavenumber       | ArFeH+                 | Detection limit | ArFeH+                 | Detection limit |
|------------------|------------------------|-----------------|------------------------|-----------------|
| cm <sup>-1</sup> | 1-photon cross-section |                 | 2-photon cross-section |                 |
| 3002.609         | 3.17E-22               | 2.18E-22        | 5.86E-21               | 4.82E-21        |
| 3032.551         | 2.44E-22               | 1.53E-22        | 5.10E-21               | 4.02E-21        |
| 3062.494         | 2.99E-22               | 2.00E-22        | 5.63E-21               | 4.56E-21        |
| 3092.436         | 2.96E-22               | 1.99E-22        | 5.58E-21               | 4.53E-21        |
| 3122.378         | 2.37E-22               | 2.21E-22        | 4.97E-21               | 4.83E-21        |
| 3152.321         | 3.25E-22               | 1.78E-22        | 5.83E-21               | 4.29E-21        |
| 3182.263         | 2.33E-22               | 1.69E-22        | 4.82E-21               | 4.08E-21        |
| 3212.206         | 3.10E-22               | 1.99E-22        | 5.50E-21               | 4.34E-21        |
| 3242.148         | 2.75E-22               | 1.62E-22        | 5.13E-21               | 3.90E-21        |
| 3272.090         | 2.10E-22               | 1.96E-22        | 4.52E-21               | 4.34E-21        |
| 3302.033         | 2.00E-22               | 1.70E-22        | 4.42E-21               | 4.06E-21        |
| 3331.975         | 2.73E-22               | 1.28E-22        | 5.18E-21               | 3.55E-21        |
| 3361.918         | 1.87E-22               | 1.32E-22        | 4.22E-21               | 3.55E-21        |
| 3391.860         | 2.87E-22               | 1.25E-22        | 5.17E-21               | 3.37E-21        |
| 3421.802         | 2.46E-22               | 1.27E-22        | 4.65E-21               | 3.28E-21        |
| 3451.745         | 3.67E-22               | 1.19E-22        | 5.51E-21               | 3.11E-21        |
| 3471.706         | 3.53E-22               | 1.33E-22        | 5.32E-21               | 3.25E-21        |
| 3481.687         | 4.12E-22               | 1.04E-22        | 5.78E-21               | 2.85E-21        |
| 3491.668         | 4.06E-22               | 1.21E-22        | 6.00E-21               | 3.24E-21        |
| 3501.649         | 4.31E-22               | 1.38E-22        | 6.60E-21               | 3.68E-21        |
| 3511.630         | 5.24E-22               | 2.24E-22        | 7.99E-21               | 5.16E-21        |
| 3521.610         | 4.55E-22               | 1.52E-22        | 6.42E-21               | 3.68E-21        |
| 3531.591         | 3.73E-22               | 1.41E-22        | 5.25E-21               | 3.19E-21        |
| 3541.572         | 2.83E-22               | 1.24E-22        | 4.46E-21               | 2.93E-21        |
| 3551.553         | 2.87E-22               | 1.12E-22        | 4.60E-21               | 2.83E-21        |
| 3561.534         | 2.72E-22               | 1.15E-22        | 4.57E-21               | 2.93E-21        |
| 3571.514         | 3.00E-22               | 1.09E-22        | 4.84E-21               | 2.88E-21        |
| 3581.495         | 4.01E-22               | 1.10E-22        | 5.65E-21               | 2.92E-21        |
| 3591.476         | 6.12E-22               | 1.29E-22        | 7.08E-21               | 3.18E-21        |
| 3601.457         | 1.00E-21               | 1.11E-22        | 9.23E-21               | 2.98E-21        |
| 3611.438         | 1.57E-21               | 1.04E-22        | 1.18E-20               | 2.89E-21        |
| 3621.418         | 2.41E-21               | 1.33E-22        | 1.50E-20               | 3.36E-21        |
| 3631.399         | 2.91E-21               | 1.50E-22        | 1.65E-20               | 3.55E-21        |
| 3641.380         | 2.76E-21               | 1.28E-22        | 1.63E-20               | 3.32E-21        |
| 3651.361         | 2.37E-21               | 1.07E-22        | 1.48E-20               | 2.97E-21        |
| 3661.342         | 1.67E-21               | 1.08E-22        | 1.23E-20               | 2.97E-21        |
| 3671.322         | 1.13E-21               | 1.15E-22        | 9.82E-21               | 3.02E-21        |
| 3681.303         | 9.39E-22               | 1.61E-22        | 8.92E-21               | 3.59E-21        |

| Wavenumber       | ArFeH+                 | Detection limit | ArFeH+                 | Detection limit |
|------------------|------------------------|-----------------|------------------------|-----------------|
| cm <sup>-1</sup> | 1-photon cross-section |                 | 2-photon cross-section |                 |
| 3691.284         | 8.33E-22               | 9.56E-23        | 8.28E-21               | 2.70E-21        |
| 3701.265         | 6.48E-22               | 1.19E-22        | 7.27E-21               | 3.04E-21        |
| 3711.246         | 4.84E-22               | 1.05E-22        | 6.15E-21               | 2.79E-21        |
| 3721.226         | 4.35E-22               | 1.57E-22        | 5.83E-21               | 3.46E-21        |
| 3731.207         | 5.65E-22               | 1.17E-22        | 6.61E-21               | 2.95E-21        |
| 3741.188         | 5.74E-22               | 1.29E-22        | 6.72E-21               | 3.10E-21        |
| 3751.169         | 5.67E-22               | 1.47E-22        | 6.56E-21               | 3.26E-21        |
| 3761.150         | 5.71E-22               | 1.17E-22        | 6.50E-21               | 2.88E-21        |
| 3771.130         | 7.24E-22               | 1.11E-22        | 7.30E-21               | 2.76E-21        |
| 3781.111         | 5.98E-22               | 8.99E-23        | 6.49E-21               | 2.44E-21        |
| 3791.092         | 4.32E-22               | 1.14E-22        | 5.53E-21               | 2.79E-21        |
| 3811.054         | 3.27E-22               | 1.17E-22        | 4.72E-21               | 2.79E-21        |
| 3831.015         | 3.52E-22               | 8.17E-23        | 4.83E-21               | 2.30E-21        |
| 3850.977         | 3.19E-22               | 9.70E-23        | 4.60E-21               | 2.49E-21        |
| 3870.938         | 3.21E-22               | 1.03E-22        | 4.72E-21               | 2.63E-21        |
| 3890.900         | 2.90E-22               | 1.25E-22        | 4.56E-21               | 2.95E-21        |
| 3910.862         | 3.68E-22               | 1.04E-22        | 5.27E-21               | 2.73E-21        |
| 3930.823         | 3.35E-22               | 1.11E-22        | 5.11E-21               | 2.91E-21        |
| 3950.785         | 3.52E-22               | 1.42E-22        | 5.33E-21               | 3.36E-21        |
| 3970.746         | 3.52E-22               | 1.64E-22        | 5.40E-21               | 3.66E-21        |
| 3990.708         | 2.77E-22               | 1.43E-22        | 4.91E-21               | 3.51E-21        |

**Table S12.** ArFeD<sup>+</sup> 1&2-photon process cross-section data

| Wavenumber       | ArFeD+                 | Detection limit | ArFeD+                 | Detection limit |
|------------------|------------------------|-----------------|------------------------|-----------------|
| cm <sup>-1</sup> | 1-photon cross-section |                 | 2-photon cross-section |                 |
| 2234.087         | 1.40E-21               | 1.54E-21        | 2.20E-20               | 2.31E-20        |
| 2254.049         | 1.38E-21               | 1.60E-21        | 2.07E-20               | 2.24E-20        |
| 2274.010         | 1.77E-21               | 1.72E-21        | 2.32E-20               | 2.29E-20        |
| 2293.972         | 1.28E-21               | 1.13E-21        | 1.93E-20               | 1.80E-20        |
| 2313.934         | 1.70E-21               | 1.32E-21        | 2.30E-20               | 2.02E-20        |
| 2333.895         | 1.51E-21               | 1.48E-21        | 2.20E-20               | 2.17E-20        |
| 2353.857         | 1.87E-21               | 1.88E-21        | 2.39E-20               | 2.39E-20        |
| 2373.818         | 1.65E-21               | 1.23E-21        | 2.16E-20               | 1.86E-20        |
| 2393.780         | 1.50E-21               | 8.36E-22        | 1.94E-20               | 1.45E-20        |
| 2413.742         | 1.27E-21               | 7.13E-22        | 1.73E-20               | 1.28E-20        |
| 2433.703         | 1.50E-21               | 8.10E-22        | 1.84E-20               | 1.34E-20        |
| 2453.665         | 9.81E-22               | 1.07E-21        | 1.41E-20               | 1.49E-20        |
| 2473.626         | 1.23E-21               | 7.05E-22        | 1.55E-20               | 1.17E-20        |
| 2493.588         | 1.19E-21               | 4.72E-22        | 1.50E-20               | 9.28E-21        |
| 2513.550         | 1.24E-21               | 5.05E-22        | 1.52E-20               | 9.58E-21        |
| 2533.511         | 1.29E-21               | 5.49E-22        | 1.53E-20               | 9.83E-21        |
| 2553.473         | 1.15E-21               | 5.07E-22        | 1.43E-20               | 9.34E-21        |
| 2573.434         | 1.32E-21               | 4.96E-22        | 1.53E-20               | 9.23E-21        |
| 2593.396         | 1.79E-21               | 4.34E-22        | 1.79E-20               | 8.59E-21        |
| 2613.358         | 2.04E-21               | 4.40E-22        | 1.90E-20               | 8.63E-21        |
| 2633.319         | 2.06E-21               | 3.96E-22        | 1.90E-20               | 8.09E-21        |
| 2653.281         | 1.60E-21               | 3.98E-22        | 1.63E-20               | 7.99E-21        |
| 2673.242         | 8.12E-22               | 5.37E-22        | 1.13E-20               | 9.11E-21        |
| 2693.204         | 1.10E-21               | 3.41E-22        | 1.31E-20               | 7.18E-21        |
| 2713.166         | 9.76E-22               | 3.92E-22        | 1.22E-20               | 7.64E-21        |
| 2733.127         | 1.02E-21               | 4.18E-22        | 1.24E-20               | 7.84E-21        |
| 2753.089         | 1.06E-21               | 2.67E-22        | 1.26E-20               | 6.22E-21        |
| 2773.050         | 8.01E-22               | 3.73E-22        | 1.07E-20               | 7.27E-21        |
| 2793.012         | 7.95E-22               | 3.72E-22        | 1.06E-20               | 7.17E-21        |
| 2812.974         | 7.45E-22               | 2.98E-22        | 1.01E-20               | 6.32E-21        |
| 2832.935         | 8.73E-22               | 3.15E-22        | 1.09E-20               | 6.44E-21        |
| 2852.897         | 9.04E-22               | 2.98E-22        | 1.10E-20               | 6.19E-21        |
| 2872.858         | 8.14E-22               | 2.92E-22        | 1.02E-20               | 6.05E-21        |
| 2892.820         | 7.60E-22               | 3.03E-22        | 9.79E-21               | 6.10E-21        |
| 2912.782         | 5.98E-22               | 2.66E-22        | 8.49E-21               | 5.61E-21        |
| 2932.743         | 7.17E-22               | 2.69E-22        | 9.22E-21               | 5.53E-21        |
| 2952.705         | 6.21E-22               | 4.10E-22        | 8.39E-21               | 6.80E-21        |



| Wavenumber       | ArFeD+                 | Detection limit | ArFeD+                 | Detection limit |
|------------------|------------------------|-----------------|------------------------|-----------------|
| cm <sup>-1</sup> | 1-photon cross-section |                 | 2-photon cross-section |                 |
| 2972.666         | 7.18E-22               | 2.09E-22        | 8.94E-21               | 4.74E-21        |
| 2992.628         | 6.80E-22               | 2.36E-22        | 8.64E-21               | 5.01E-21        |
|                  |                        |                 |                        |                 |
| 2793.012         | 4.17E-22               | 3.83E-22        | 7.64E-21               | 7.32E-21        |
| 2812.974         | 2.88E-22               | 6.20E-22        | 6.22E-21               | 9.20E-21        |
| 2832.935         | 4.91E-22               | 5.68E-22        | 8.13E-21               | 8.74E-21        |
| 2852.897         | 4.73E-22               | 4.67E-22        | 7.88E-21               | 7.82E-21        |
| 2872.858         | 4.73E-22               | 6.57E-22        | 7.76E-21               | 9.20E-21        |
| 2892.820         | 3.17E-22               | 5.60E-22        | 6.25E-21               | 8.35E-21        |
| 2912.782         | 2.50E-22               | 5.07E-22        | 5.46E-21               | 7.84E-21        |
| 2932.743         | 4.70E-22               | 4.99E-22        | 7.42E-21               | 7.64E-21        |
| 2952.705         | 3.98E-22               | 3.97E-22        | 6.74E-21               | 6.69E-21        |
| 2972.666         | 4.43E-22               | 4.86E-22        | 6.97E-21               | 7.32E-21        |
| 2992.628         | 3.66E-22               | 3.36E-22        | 6.31E-21               | 6.01E-21        |
| 3017.580         | 2.58E-22               | 3.79E-22        | 5.21E-21               | 6.39E-21        |
| 3042.532         | 2.97E-22               | 5.47E-22        | 5.57E-21               | 7.66E-21        |
| 3067.484         | 3.26E-22               | 3.20E-22        | 5.85E-21               | 5.80E-21        |
| 3092.436         | 3.47E-22               | 4.26E-22        | 6.04E-21               | 6.71E-21        |
| 3117.388         | 3.25E-22               | 4.37E-22        | 5.83E-21               | 6.80E-21        |
| 3142.340         | 3.74E-22               | 2.90E-22        | 6.30E-21               | 5.52E-21        |
| 3167.292         | 3.17E-22               | 3.66E-22        | 5.66E-21               | 6.08E-21        |
| 3192.244         | 4.31E-22               | 4.95E-22        | 6.59E-21               | 7.09E-21        |
| 3217.196         | 3.79E-22               | 3.41E-22        | 6.01E-21               | 5.70E-21        |
| 3242.148         | 2.39E-22               | 9.11E-22        | 4.75E-21               | 9.46E-21        |
| 3267.100         | 3.42E-22               | 4.02E-22        | 5.75E-21               | 6.24E-21        |
| 3292.052         | 2.58E-22               | 8.06E-22        | 5.06E-21               | 9.07E-21        |
| 3317.004         | 3.94E-22               | 4.36E-22        | 6.25E-21               | 6.61E-21        |
| 3341.956         | 2.89E-22               | 4.97E-22        | 5.29E-21               | 7.00E-21        |
| 3366.908         | 3.88E-22               | 4.90E-22        | 6.11E-21               | 6.90E-21        |
| 3391.860         | 3.82E-22               | 5.26E-22        | 5.99E-21               | 7.05E-21        |
| 3416.812         | 3.48E-22               | 4.29E-22        | 5.55E-21               | 6.20E-21        |
| 3441.764         | 3.15E-22               | 3.57E-22        | 5.11E-21               | 5.45E-21        |
| 3466.716         | 1.85E-22               | 3.52E-22        | 3.84E-21               | 5.35E-21        |
| 3491.668         | 1.48E-22               | 6.44E-22        | 3.57E-21               | 7.58E-21        |
| 3516.620         | 4.80E-22               | 7.26E-22        | 7.14E-21               | 8.88E-21        |
| 3541.572         | 2.25E-22               | 5.74E-22        | 3.93E-21               | 6.38E-21        |
| 3566.524         | 4.22E-22               | 3.75E-22        | 5.72E-21               | 5.38E-21        |
| 3591.476         | 2.97E-22               | 4.70E-22        | 4.76E-21               | 6.06E-21        |

| Wavenumber       | ArFeD+                 | Detection limit | ArFeD+                 | Detection limit |
|------------------|------------------------|-----------------|------------------------|-----------------|
| cm <sup>-1</sup> | 1-photon cross-section |                 | 2-photon cross-section |                 |
| 3616.428         | 3.10E-22               | 4.40E-22        | 4.89E-21               | 5.84E-21        |
| 3641.380         | 2.84E-22               | 5.08E-22        | 4.67E-21               | 6.32E-21        |
| 3666.332         | 3.11E-22               | 4.66E-22        | 4.89E-21               | 6.04E-21        |
| 3691.284         | 2.22E-22               | 4.59E-22        | 4.04E-21               | 5.85E-21        |
| 3716.236         | 3.17E-22               | 6.38E-22        | 4.79E-21               | 6.89E-21        |
| 3741.188         | 2.57E-22               | 4.80E-22        | 4.23E-21               | 5.86E-21        |
| 3766.140         | 1.79E-22               | 5.90E-22        | 3.43E-21               | 6.38E-21        |
| 3791.092         | 3.28E-22               | 3.59E-22        | 4.62E-21               | 4.86E-21        |
| 3816.044         | 3.05E-22               | 3.77E-22        | 4.37E-21               | 4.87E-21        |
| 3840.996         | 3.34E-22               | 3.98E-22        | 4.61E-21               | 5.04E-21        |
| 3865.948         | 3.67E-22               | 4.66E-22        | 4.87E-21               | 5.51E-21        |
| 3890.900         | 3.35E-22               | 4.49E-22        | 4.79E-21               | 5.56E-21        |
| 3915.852         | 4.38E-22               | 4.88E-22        | 5.67E-21               | 6.00E-21        |
| 3940.804         | 3.52E-22               | 6.08E-22        | 5.21E-21               | 6.92E-21        |
| 3965.756         | 3.84E-22               | 4.92E-22        | 5.57E-21               | 6.33E-21        |
| 3990.708         | 3.00E-22               | 4.48E-22        | 5.07E-21               | 6.25E-21        |

**Table S13.** Ar<sub>2</sub>FeH<sup>+</sup> 1-photon process cross-section data

| Wavenumber       | Ar <sub>2</sub> FeH <sup>+</sup> | Detection limit |
|------------------|----------------------------------|-----------------|
| cm <sup>-1</sup> | 1-photon cross-section           |                 |
| 2234.087         | 3.59E-21                         | 1.42E-21        |
| 2254.049         | 3.68E-21                         | 1.14E-21        |
| 2274.010         | 4.12E-21                         | 1.09E-21        |
| 2293.972         | 4.79E-21                         | 9.17E-22        |
| 2313.934         | 4.95E-21                         | 1.05E-21        |
| 2333.895         | 5.29E-21                         | 1.08E-21        |
| 2353.857         | 5.37E-21                         | 1.00E-21        |
| 2373.818         | 6.16E-21                         | 9.93E-22        |
| 2393.780         | 6.85E-21                         | 8.94E-22        |
| 2413.742         | 6.60E-21                         | 8.45E-22        |
| 2433.703         | 6.81E-21                         | 7.45E-22        |
| 2453.665         | 8.26E-21                         | 6.41E-22        |
| 2473.626         | 8.56E-21                         | 5.57E-22        |
| 2493.588         | 9.50E-21                         | 5.21E-22        |
| 2513.550         | 9.18E-21                         | 5.38E-22        |
| 2533.511         | 9.67E-21                         | 4.70E-22        |
| 2553.473         | 1.00E-20                         | 5.27E-22        |
| 2573.434         | 1.01E-20                         | 4.77E-22        |
| 2593.396         | 9.46E-21                         | 4.96E-22        |
| 2613.358         | 9.63E-21                         | 5.07E-22        |
| 2633.319         | 9.72E-21                         | 4.57E-22        |
| 2653.281         | 9.84E-21                         | 4.56E-22        |
| 2673.242         | 9.60E-21                         | 4.44E-22        |
| 2693.204         | 9.71E-21                         | 4.38E-22        |
| 2713.166         | 9.86E-21                         | 3.96E-22        |
| 2733.127         | 1.06E-20                         | 3.92E-22        |
| 2753.089         | 1.15E-20                         | 4.10E-22        |
| 2773.050         | 1.20E-20                         | 3.85E-22        |
| 2793.012         | 1.23E-20                         | 3.82E-22        |
| 2812.974         | 1.22E-20                         | 3.72E-22        |
| 2832.935         | 1.22E-20                         | 3.53E-22        |
| 2852.897         | 1.19E-20                         | 3.67E-22        |
| 2872.858         | 1.23E-20                         | 3.51E-22        |
| 2892.820         | 1.34E-20                         | 3.30E-22        |
| 2912.782         | 1.36E-20                         | 3.38E-22        |
| 2932.743         | 1.45E-20                         | 3.01E-22        |
| 2952.705         | 1.41E-20                         | 3.00E-22        |

| Wavenumber       | Ar2FeH+                | Detection limit |
|------------------|------------------------|-----------------|
| cm <sup>-1</sup> | 1-photon cross-section |                 |
| 2972.666         | 1.43E-20               | 2.98E-22        |
| 2992.628         | 1.45E-20               | 2.82E-22        |
| 3012.590         | 1.56E-20               | 2.75E-22        |
| 3032.551         | 1.48E-20               | 2.63E-22        |
| 3052.513         | 1.58E-20               | 2.58E-22        |
| 3072.474         | 1.65E-20               | 2.55E-22        |
| 3092.436         | 1.67E-20               | 2.87E-22        |
| 3112.398         | 1.52E-20               | 2.76E-22        |
| 3132.359         | 1.44E-20               | 2.65E-22        |
| 3152.321         | 1.30E-20               | 2.65E-22        |
| 3172.282         | 1.22E-20               | 2.41E-22        |
| 3192.244         | 1.14E-20               | 2.40E-22        |
| 3212.206         | 1.15E-20               | 2.28E-22        |
| 3232.167         | 1.11E-20               | 2.31E-22        |
| 3252.129         | 9.56E-21               | 2.34E-22        |
| 3272.090         | 8.62E-21               | 2.21E-22        |
| 3292.052         | 6.91E-21               | 2.56E-22        |
| 3312.014         | 5.93E-21               | 2.71E-22        |
| 3331.975         | 5.54E-21               | 2.67E-22        |
| 3351.937         | 5.18E-21               | 2.64E-22        |
| 3371.898         | 5.40E-21               | 2.46E-22        |
| 3391.860         | 5.66E-21               | 2.31E-22        |
| 3411.822         | 5.57E-21               | 2.39E-22        |
| 3431.783         | 5.89E-21               | 2.01E-22        |
| 3451.745         | 6.08E-21               | 1.91E-22        |
| 3471.706         | 5.45E-21               | 1.86E-22        |
| 3491.668         | 5.34E-21               | 2.22E-22        |
| 3511.630         | 5.07E-21               | 2.96E-22        |
| 3531.591         | 4.53E-21               | 1.79E-22        |
| 3551.553         | 4.30E-21               | 1.74E-22        |
| 3571.514         | 4.10E-21               | 1.75E-22        |
| 3591.476         | 3.48E-21               | 2.10E-22        |
| 3591.476         | 3.67E-21               | 1.88E-22        |
| 3601.457         | 3.14E-21               | 2.14E-22        |
| 3611.438         | 2.92E-21               | 1.94E-22        |
| 3621.418         | 3.08E-21               | 1.90E-22        |
| 3631.399         | 3.93E-21               | 2.07E-22        |
| 3641.380         | 7.85E-21               | 2.14E-22        |

| Wavenumber       | Ar <sub>2</sub> FeH <sup>+</sup> | Detection limit |
|------------------|----------------------------------|-----------------|
| cm <sup>-1</sup> | 1-photon cross-section           |                 |
| 3651.361         | 1.70E-20                         | 2.06E-22        |
| 3661.342         | 2.03E-20                         | 2.12E-22        |
| 3671.322         | 1.41E-20                         | 1.84E-22        |
| 3681.303         | 9.13E-21                         | 2.02E-22        |
| 3691.284         | 7.24E-21                         | 2.13E-22        |
| 3701.265         | 5.90E-21                         | 2.05E-22        |
| 3711.246         | 5.27E-21                         | 1.96E-22        |
| 3721.226         | 4.45E-21                         | 1.92E-22        |
| 3731.207         | 3.72E-21                         | 1.84E-22        |
| 3741.188         | 3.13E-21                         | 1.91E-22        |
| 3751.169         | 2.70E-21                         | 1.81E-22        |
| 3761.150         | 2.40E-21                         | 1.99E-22        |
| 3771.130         | 2.26E-21                         | 2.13E-22        |
| 3781.111         | 2.42E-21                         | 2.09E-22        |
| 3791.092         | 2.61E-21                         | 2.08E-22        |
| 3811.054         | 2.62E-21                         | 1.98E-22        |
| 3831.015         | 2.68E-21                         | 2.03E-22        |
| 3850.977         | 2.88E-21                         | 2.07E-22        |
| 3870.938         | 2.31E-21                         | 2.05E-22        |
| 3890.900         | 2.15E-21                         | 2.21E-22        |
| 3910.862         | 1.70E-21                         | 2.58E-22        |
| 3930.823         | 1.51E-21                         | 2.62E-22        |
| 3950.785         | 1.48E-21                         | 2.38E-22        |
| 3970.746         | 1.35E-21                         | 2.60E-22        |

**Table S14.** Ar<sub>2</sub>FeD<sup>+</sup> 1-photon process cross-section data

| Wavenumber       | Ar <sub>2</sub> FeD <sup>+</sup> | Detection limit |
|------------------|----------------------------------|-----------------|
| cm <sup>-1</sup> | 1-photon cross-section           |                 |
| 2234.087         | 1.04E-20                         | 5.31E-21        |
| 2254.049         | 9.63E-21                         | 4.61E-21        |
| 2274.010         | 1.05E-20                         | 4.10E-21        |
| 2293.972         | 1.27E-20                         | 3.64E-21        |
| 2313.934         | 1.22E-20                         | 3.87E-21        |
| 2333.895         | 1.30E-20                         | 3.97E-21        |
| 2353.857         | 1.37E-20                         | 3.83E-21        |
| 2373.818         | 1.40E-20                         | 3.81E-21        |
| 2393.780         | 1.63E-20                         | 2.78E-21        |
| 2398.770         | 1.61E-20                         | 2.54E-21        |
| 2403.761         | 1.58E-20                         | 2.50E-21        |
| 2408.751         | 1.54E-20                         | 2.74E-21        |
| 2413.742         | 1.54E-20                         | 2.42E-21        |
| 2418.732         | 1.64E-20                         | 2.53E-21        |
| 2423.722         | 1.59E-20                         | 2.54E-21        |
| 2428.713         | 1.53E-20                         | 2.66E-21        |
| 2433.703         | 1.58E-20                         | 2.55E-21        |
| 2438.694         | 1.74E-20                         | 1.98E-21        |
| 2443.684         | 1.53E-20                         | 2.26E-21        |
| 2448.674         | 1.59E-20                         | 2.24E-21        |
| 2453.665         | 1.69E-20                         | 2.01E-21        |
| 2458.655         | 1.68E-20                         | 1.97E-21        |
| 2463.646         | 1.64E-20                         | 2.07E-21        |
| 2468.636         | 1.61E-20                         | 2.09E-21        |
| 2473.626         | 1.69E-20                         | 1.96E-21        |
| 2478.617         | 1.71E-20                         | 1.78E-21        |
| 2483.607         | 1.62E-20                         | 1.94E-21        |
| 2488.598         | 1.69E-20                         | 1.88E-21        |
| 2493.588         | 1.71E-20                         | 2.04E-21        |
| 2497.580         | 1.80E-20                         | 1.79E-21        |
| 2501.573         | 1.72E-20                         | 1.65E-21        |
| 2505.565         | 1.78E-20                         | 2.00E-21        |
| 2509.557         | 1.68E-20                         | 1.71E-21        |
| 2513.550         | 1.72E-20                         | 1.73E-21        |
| 2517.542         | 1.63E-20                         | 1.72E-21        |
| 2521.534         | 1.70E-20                         | 1.61E-21        |
| 2525.526         | 1.94E-20                         | 1.57E-21        |

| Wavenumber       | Ar2FeD+                | Detection limit |
|------------------|------------------------|-----------------|
| cm <sup>-1</sup> | 1-photon cross-section |                 |
| 2529.519         | 1.79E-20               | 1.61E-21        |
| 2533.511         | 1.82E-20               | 1.81E-21        |
| 2537.503         | 1.95E-20               | 1.49E-21        |
| 2541.496         | 1.88E-20               | 1.52E-21        |
| 2545.488         | 1.92E-20               | 1.67E-21        |
| 2549.480         | 1.96E-20               | 1.88E-21        |
| 2553.473         | 1.82E-20               | 1.79E-21        |
| 2557.465         | 1.80E-20               | 1.43E-21        |
| 2561.457         | 1.71E-20               | 1.57E-21        |
| 2565.450         | 1.69E-20               | 1.29E-21        |
| 2569.442         | 1.61E-20               | 1.35E-21        |
| 2573.434         | 1.57E-20               | 1.70E-21        |
| 2577.427         | 1.59E-20               | 1.67E-21        |
| 2581.419         | 1.61E-20               | 1.46E-21        |
| 2585.411         | 1.56E-20               | 1.65E-21        |
| 2589.404         | 1.68E-20               | 1.67E-21        |
| 2593.396         | 1.45E-20               | 1.47E-21        |
| 2597.388         | 1.60E-20               | 1.71E-21        |
| 2601.381         | 1.53E-20               | 1.71E-21        |
| 2605.373         | 1.53E-20               | 1.41E-21        |
| 2607.369         | 1.52E-20               | 1.61E-21        |
| 2609.365         | 1.47E-20               | 1.65E-21        |
| 2611.361         | 1.46E-20               | 1.60E-21        |
| 2613.358         | 1.40E-20               | 1.74E-21        |
| 2615.354         | 1.45E-20               | 1.55E-21        |
| 2617.350         | 1.57E-20               | 1.54E-21        |
| 2619.346         | 1.56E-20               | 1.48E-21        |
| 2621.342         | 1.66E-20               | 1.40E-21        |
| 2623.338         | 1.58E-20               | 1.34E-21        |
| 2625.334         | 1.71E-20               | 1.63E-21        |
| 2627.331         | 1.74E-20               | 1.62E-21        |
| 2629.327         | 1.87E-20               | 1.64E-21        |
| 2631.323         | 2.17E-20               | 1.73E-21        |
| 2633.319         | 2.22E-20               | 1.90E-21        |
| 2635.315         | 2.44E-20               | 1.49E-21        |
| 2637.311         | 2.80E-20               | 1.55E-21        |
| 2639.308         | 2.91E-20               | 1.35E-21        |
| 2641.304         | 3.11E-20               | 1.54E-21        |

| Wavenumber       | Ar2FeD+                | Detection limit |
|------------------|------------------------|-----------------|
| cm <sup>-1</sup> | 1-photon cross-section |                 |
| 2643.300         | 3.28E-20               | 1.49E-21        |
| 2645.296         | 3.52E-20               | 1.60E-21        |
| 2647.292         | 3.60E-20               | 1.68E-21        |
| 2649.288         | 3.89E-20               | 1.59E-21        |
| 2651.285         | 3.88E-20               | 1.95E-21        |
| 2653.281         | 3.71E-20               | 1.77E-21        |
| 2655.277         | 3.60E-20               | 1.50E-21        |
| 2657.273         | 3.37E-20               | 1.75E-21        |
| 2659.269         | 3.28E-20               | 1.61E-21        |
| 2661.265         | 2.98E-20               | 1.51E-21        |
| 2663.262         | 2.51E-20               | 1.62E-21        |
| 2665.258         | 2.37E-20               | 1.83E-21        |
| 2667.254         | 2.10E-20               | 2.10E-21        |
| 2669.250         | 1.81E-20               | 1.66E-21        |
| 2671.246         | 1.61E-20               | 1.79E-21        |
| 2673.242         | 1.46E-20               | 1.67E-21        |
| 2675.238         | 1.45E-20               | 1.87E-21        |
| 2677.235         | 1.39E-20               | 1.98E-21        |
| 2679.231         | 1.39E-20               | 1.63E-21        |
| 2681.227         | 1.32E-20               | 1.84E-21        |
| 2683.223         | 1.30E-20               | 2.45E-21        |
| 2685.219         | 1.20E-20               | 1.96E-21        |
| 2687.215         | 1.21E-20               | 1.61E-21        |
| 2689.212         | 1.27E-20               | 1.56E-21        |
| 2691.208         | 1.29E-20               | 1.55E-21        |
| 2693.204         | 1.23E-20               | 1.48E-21        |
| 2695.200         | 1.20E-20               | 1.83E-21        |
| 2697.196         | 1.21E-20               | 1.95E-21        |
| 2699.192         | 1.23E-20               | 1.73E-21        |
| 2701.189         | 1.21E-20               | 1.65E-21        |
| 2703.185         | 1.22E-20               | 1.65E-21        |
| 2705.181         | 1.27E-20               | 2.18E-21        |
| 2707.177         | 1.27E-20               | 1.04E-21        |
| 2709.173         | 1.25E-20               | 1.08E-21        |
| 2711.169         | 1.22E-20               | 1.04E-21        |
| 2713.166         | 1.25E-20               | 1.12E-21        |
| 2713.166         | 1.27E-20               | 1.24E-21        |
| 2718.156         | 1.23E-20               | 1.12E-21        |



| Wavenumber       | Ar2FeD+                | Detection limit |
|------------------|------------------------|-----------------|
| cm <sup>-1</sup> | 1-photon cross-section |                 |
| 2723.146         | 1.19E-20               | 8.44E-22        |
| 2728.137         | 1.22E-20               | 9.25E-22        |
| 2733.127         | 1.25E-20               | 9.74E-22        |
| 2738.118         | 1.23E-20               | 1.82E-21        |
| 2743.108         | 1.29E-20               | 1.71E-21        |
| 2748.098         | 1.30E-20               | 1.52E-21        |
| 2753.089         | 1.32E-20               | 1.50E-21        |
| 2758.079         | 1.27E-20               | 1.71E-21        |
| 2763.070         | 1.24E-20               | 1.41E-21        |
| 2768.060         | 1.21E-20               | 1.58E-21        |
| 2773.050         | 1.28E-20               | 1.59E-21        |
| 2778.041         | 1.28E-20               | 1.51E-21        |
| 2783.031         | 1.28E-20               | 1.43E-21        |
| 2788.022         | 1.31E-20               | 1.83E-21        |
| 2793.012         | 1.28E-20               | 1.91E-21        |
| 2812.974         | 1.12E-20               | 1.19E-21        |
| 2832.935         | 1.04E-20               | 1.22E-21        |
| 2852.897         | 1.00E-20               | 1.17E-21        |
| 2872.858         | 1.05E-20               | 1.06E-21        |
| 2892.820         | 1.06E-20               | 9.71E-22        |
| 2912.782         | 1.10E-20               | 1.02E-21        |
| 2932.743         | 1.07E-20               | 8.50E-22        |
| 2952.705         | 1.02E-20               | 8.44E-22        |
| 2972.666         | 9.94E-21               | 7.95E-22        |
| 2992.628         | 1.03E-20               | 8.09E-22        |
| 3012.590         | 9.70E-21               | 7.99E-22        |
| 3032.551         | 1.07E-20               | 8.92E-22        |
| 3052.513         | 1.05E-20               | 8.52E-22        |
| 3072.474         | 9.81E-21               | 7.77E-22        |
| 3092.436         | 9.14E-21               | 8.17E-22        |
| 3112.398         | 8.80E-21               | 6.90E-22        |
| 3132.359         | 8.97E-21               | 7.68E-22        |
| 3152.321         | 8.44E-21               | 8.27E-22        |
| 3172.282         | 7.90E-21               | 7.46E-22        |
| 3192.244         | 7.96E-21               | 7.33E-22        |
| 3212.206         | 7.94E-21               | 7.33E-22        |
| 3232.167         | 7.24E-21               | 6.46E-22        |
| 3252.129         | 6.27E-21               | 6.75E-22        |

| Wavenumber       | Ar2FeD+                | Detection limit |
|------------------|------------------------|-----------------|
| cm <sup>-1</sup> | 1-photon cross-section |                 |
| 3272.090         | 5.86E-21               | 7.32E-22        |
| 3292.052         | 5.03E-21               | 6.51E-22        |
| 3312.014         | 4.41E-21               | 7.01E-22        |
| 3331.975         | 4.05E-21               | 6.88E-22        |
| 3351.937         | 3.89E-21               | 6.62E-22        |
| 3371.898         | 4.05E-21               | 7.05E-22        |
| 3391.860         | 3.88E-21               | 6.37E-22        |
| 3411.822         | 3.91E-21               | 5.61E-22        |
| 3431.783         | 4.21E-21               | 5.36E-22        |
| 3451.745         | 3.88E-21               | 5.61E-22        |
| 3471.706         | 3.86E-21               | 5.35E-22        |
| 3491.668         | 3.85E-21               | 5.46E-22        |
| 3511.630         | 3.71E-21               | 8.36E-22        |
| 3531.591         | 3.20E-21               | 4.81E-22        |
| 3551.553         | 2.93E-21               | 4.78E-22        |
| 3571.514         | 2.55E-21               | 5.12E-22        |
| 3591.476         | 2.74E-21               | 4.91E-22        |
| 3611.438         | 2.44E-21               | 5.07E-22        |
| 3631.399         | 2.45E-21               | 4.52E-22        |
| 3651.361         | 2.35E-21               | 4.80E-22        |
| 3671.322         | 2.06E-21               | 2.70E-22        |
| 3691.284         | 2.08E-21               | 3.87E-22        |
| 3711.246         | 1.82E-21               | 4.37E-22        |
| 3731.207         | 1.92E-21               | 3.87E-22        |
| 3751.169         | 1.82E-21               | 4.08E-22        |
| 3771.130         | 1.67E-21               | 3.52E-22        |
| 3791.092         | 1.60E-21               | 3.52E-22        |
| 3811.054         | 1.66E-21               | 3.84E-22        |
| 3831.015         | 1.55E-21               | 3.53E-22        |
| 3850.977         | 1.49E-21               | 3.96E-22        |
| 3870.938         | 1.46E-21               | 3.92E-22        |
| 3890.900         | 1.32E-21               | 3.91E-22        |
| 3910.862         | 1.39E-21               | 4.04E-22        |
| 3930.823         | 1.47E-21               | 4.75E-22        |
| 3950.785         | 1.25E-21               | 4.94E-22        |
| 3970.746         | 1.37E-21               | 5.36E-22        |
| 3990.708         | 1.27E-21               | 5.71E-22        |

**Table S15.** Ar<sub>2</sub>FeH<sup>+</sup> 1-photon cross-section in 4450-14000 cm<sup>-1</sup> range.

| Wavenumber       | Ar <sub>2</sub> FeH <sup>+</sup> | Detection limit |
|------------------|----------------------------------|-----------------|
| cm <sup>-1</sup> | 1-photon cross-section           |                 |
| 4453.803         | 1.33E-20                         | 1.16E-20        |
| 4471.636         | 1.22E-20                         | 1.11E-20        |
| 4491.110         | 1.17E-20                         | 1.04E-20        |
| 4511.807         | 1.28E-20                         | 9.42E-21        |
| 4532.095         | 1.42E-20                         | 8.93E-21        |
| 4551.709         | 1.21E-20                         | 7.64E-21        |
| 4572.626         | 1.37E-20                         | 7.62E-21        |
| 4593.863         | 1.55E-20                         | 7.72E-21        |
| 4613.953         | 1.56E-20                         | 6.41E-21        |
| 4633.177         | 2.06E-20                         | 7.01E-21        |
| 4653.643         | 1.66E-20                         | 7.14E-21        |
| 4673.478         | 2.55E-20                         | 5.34E-21        |
| 4693.721         | 2.67E-20                         | 7.04E-21        |
| 4714.179         | 2.62E-20                         | 6.11E-21        |
| 4733.950         | 2.88E-20                         | 5.73E-21        |
| 4753.871         | 3.22E-20                         | 6.93E-21        |
| 4774.145         | 3.23E-20                         | 6.26E-21        |
| 4794.372         | 3.31E-20                         | 5.61E-21        |
| 4814.738         | 3.56E-20                         | 5.56E-21        |
| 4834.330         | 3.49E-20                         | 5.35E-21        |
| 4854.562         | 3.48E-20                         | 5.26E-21        |
| 4874.546         | 3.57E-20                         | 5.21E-21        |
| 4895.134         | 3.48E-20                         | 6.66E-21        |
| 4914.957         | 3.52E-20                         | 5.03E-21        |
| 4935.267         | 3.70E-20                         | 4.82E-21        |
| 4955.576         | 3.69E-20                         | 5.37E-21        |
| 4975.421         | 3.51E-20                         | 4.42E-21        |
| 4994.486         | 3.28E-20                         | 5.09E-21        |
| 5014.572         | 3.70E-20                         | 5.33E-21        |
| 5034.631         | 3.31E-20                         | 4.49E-21        |
| 5054.896         | 3.13E-20                         | 4.68E-21        |
| 5074.419         | 3.19E-20                         | 2.99E-21        |
| 5094.913         | 3.15E-20                         | 3.78E-21        |
| 5115.584         | 3.07E-20                         | 4.07E-21        |
| 5135.956         | 3.01E-20                         | 3.74E-21        |
| 5155.931         | 2.94E-20                         | 3.97E-21        |
| 5175.587         | 2.99E-20                         | 3.76E-21        |

| Wavenumber       | Ar <sup>2</sup> FeH <sup>+</sup> | Detection limit |
|------------------|----------------------------------|-----------------|
| cm <sup>-1</sup> | 1-photon cross-section           |                 |
| 5195.847         | 2.85E-20                         | 3.50E-21        |
| 5215.371         | 2.73E-20                         | 3.31E-21        |
| 5235.238         | 2.75E-20                         | 3.14E-21        |
| 5255.827         | 2.76E-20                         | 3.04E-21        |
| 5275.241         | 2.73E-20                         | 3.29E-21        |
| 5295.685         | 2.52E-20                         | 2.96E-21        |
| 5315.906         | 2.37E-20                         | 3.38E-21        |
| 5335.798         | 2.30E-20                         | 2.78E-21        |
| 5356.060         | 2.20E-20                         | 3.06E-21        |
| 5376.162         | 2.38E-20                         | 3.11E-21        |
| 5396.386         | 2.44E-20                         | 3.44E-21        |
| 5416.954         | 2.10E-20                         | 2.98E-21        |
| 5437.439         | 2.00E-20                         | 2.89E-21        |
| 5457.628         | 1.92E-20                         | 2.87E-21        |
| 5477.213         | 1.90E-20                         | 2.92E-21        |
| 5497.064         | 1.69E-20                         | 3.31E-21        |
| 5517.798         | 1.72E-20                         | 2.98E-21        |
| 5536.817         | 1.70E-20                         | 2.97E-21        |
| 5557.374         | 1.63E-20                         | 2.68E-21        |
| 5577.942         | 1.49E-20                         | 2.52E-21        |
| 5598.599         | 1.42E-20                         | 2.32E-21        |
| 5617.293         | 1.33E-20                         | 3.11E-21        |
| 5638.625         | 1.33E-20                         | 2.94E-21        |
| 5659.495         | 1.08E-20                         | 2.59E-21        |
| 5678.917         | 1.19E-20                         | 2.53E-21        |
| 5699.919         | 1.18E-20                         | 3.13E-21        |
| 5719.250         | 1.08E-20                         | 2.46E-21        |
| 5739.359         | 9.82E-21                         | 2.05E-21        |
| 5758.335         | 8.90E-21                         | 2.29E-21        |
| 5779.118         | 8.85E-21                         | 2.67E-21        |
| 5799.536         | 8.34E-21                         | 2.30E-21        |
| 5818.392         | 7.25E-21                         | 2.47E-21        |
| 5838.898         | 7.16E-21                         | 2.18E-21        |
| 5859.353         | 6.91E-21                         | 2.39E-21        |
| 5878.439         | 6.80E-21                         | 2.34E-21        |
| 5899.148         | 5.95E-21                         | 2.13E-21        |
| 5920.635         | 6.25E-21                         | 2.29E-21        |
| 5942.265         | 6.13E-21                         | 2.67E-21        |

| Wavenumber       | Ar <sub>2</sub> FeH <sup>+</sup> | Detection limit |
|------------------|----------------------------------|-----------------|
| cm <sup>-1</sup> | 1-photon cross-section           |                 |
| 5962.002         | 4.95E-21                         | 2.27E-21        |
| 5981.147         | 4.89E-21                         | 2.06E-21        |
| 5983.577         | 4.88E-21                         | 2.50E-21        |
| 6082.396         | 3.78E-21                         | 2.54E-21        |
| 6182.988         | 3.08E-21                         | 2.38E-21        |
| 6282.165         | 2.78E-21                         | 2.39E-21        |
| 6383.279         | 2.46E-21                         | 2.20E-21        |
| 6484.348         | 3.17E-21                         | 1.94E-21        |
| 6582.602         | 2.52E-21                         | 2.03E-21        |
| 6684.117         | 0                                | 2.03E-21        |
| 6784.030         | 2.53E-21                         | 2.29E-21        |
| 6883.629         | 0                                | 2.16E-21        |
| 6982.153         | 0                                | 4.01E-21        |
| 7082.484         | 0                                | 7.59E-21        |
| 7181.220         | 0                                | 2.78E-21        |
| 7282.595         | 0                                | 2.83E-21        |
| 7381.376         | 0                                | 2.98E-21        |
| 7481.575         | 0                                | 3.19E-21        |
| 7580.995         | 0                                | 5.27E-21        |
| 7681.972         | 0                                | 6.00E-21        |
| 7781.653         | 0                                | 7.39E-21        |
| 7881.071         | 0                                | 7.22E-21        |
| 7980.840         | 0                                | 6.66E-21        |
| 8080.808         | 0                                | 5.88E-21        |
| 8181.867         | 0                                | 5.93E-21        |
| 8282.856         | 0                                | 6.53E-21        |
| 8384.261         | 0                                | 8.87E-21        |
| 8483.441         | 0                                | 7.21E-21        |
| 8584.929         | 0                                | 6.24E-21        |
| 8685.879         | 0                                | 4.91E-21        |
| 8785.501         | 0                                | 5.80E-21        |
| 8886.061         | 0                                | 5.79E-21        |
| 8986.833         | 0                                | 7.45E-22        |
| 9087.712         | 0                                | 7.02E-22        |
| 9188.052         | 0                                | 8.59E-22        |
| 9289.484         | 0                                | 7.16E-22        |
| 9390.165         | 0                                | 7.17E-22        |
| 9491.538         | 0                                | 6.38E-22        |

| Wavenumber       | Ar2FeH+                | Detection limit |
|------------------|------------------------|-----------------|
| cm <sup>-1</sup> | 1-photon cross-section |                 |
| 9591.379         | 0                      | 6.23E-22        |
| 9692.703         | 0                      | 6.07E-22        |
| 9792.689         | 0                      | 5.57E-22        |
| 9892.107         | 0                      | 6.78E-22        |
| 9992.156         | 0                      | 6.01E-22        |
| 10092.530        | 0                      | 5.28E-22        |
| 10194.290        | 0                      | 3.71E-21        |
| 10243.180        | 0                      | 2.96E-21        |
| 10296.060        | 0                      | 1.29E-21        |
| 10395.320        | 0                      | 1.20E-21        |
| 10495.590        | 0                      | 1.21E-21        |
| 10595.500        | 0                      | 1.03E-21        |
| 10694.550        | 0                      | 8.48E-22        |
| 10794.940        | 0                      | 1.05E-21        |
| 10894.560        | 0                      | 8.72E-22        |
| 10943.400        | 0                      | 9.27E-22        |
| 10994.880        | 0                      | 2.95E-21        |
| 11044.220        | 0                      | 1.05E-21        |
| 11095.360        | 0                      | 9.64E-22        |
| 11145.020        | 0                      | 1.16E-21        |
| 11195.960        | 0                      | 7.31E-22        |
| 11297.140        | 0                      | 7.68E-22        |
| 11395.690        | 0                      | 7.18E-22        |
| 11494.900        | 0                      | 6.41E-22        |
| 11593.890        | 0                      | 2.79E-21        |
| 11693.240        | 0                      | 2.74E-21        |
| 11794.480        | 0                      | 3.07E-21        |
| 11895.230        | 0                      | 3.59E-21        |
| 11993.920        | 0                      | 2.80E-21        |
| 12093.290        | 0                      | 2.56E-21        |
| 12193.750        | 0                      | 2.79E-21        |
| 12294.810        | 0                      | 2.92E-21        |
| 12395.380        | 0                      | 2.97E-21        |
| 12494.960        | 0                      | 3.22E-21        |
| 12596.250        | 0                      | 3.35E-21        |
| 12695.780        | 0                      | 3.12E-21        |
| 12796.710        | 0                      | 3.73E-21        |
| 12895.370        | 0                      | 3.75E-21        |

| Wavenumber       | Ar2FeH+                | Detection limit |
|------------------|------------------------|-----------------|
| cm <sup>-1</sup> | 1-photon cross-section |                 |
| 12995.370        | 0                      | 3.97E-21        |
| 13094.820        | 0                      | 3.81E-21        |
| 13195.360        | 0                      | 4.34E-21        |
| 13295.610        | 0                      | 4.73E-21        |
| 13396.740        | 0                      | 4.65E-21        |
| 13497.880        | 0                      | 4.76E-21        |
| 13599.060        | 0                      | 4.75E-21        |
| 13700.860        | 0                      | 5.05E-21        |
| 13801.970        | 0                      | 5.34E-21        |
| 13903.100        | 0                      | 5.90E-21        |
| 14006.070        | 0                      | 5.49E-21        |
